# Supplementary material for: Functional Loss of Terminal Complement Complex Protects Rabbits from Injury-Induced Osteoarthritis on Structural and Cellular Level
Source: MDPI journal article supplement (doi:10.3390/biom13020216), 2023-01-22
Supplement: s1 [file s1]

## Supplementary Material

### Supplementary Tables

**Table S1: Primer for genetic characterization of the C6-deficiency.**

|                                                                                                     |                                                                       |
|-----------------------------------------------------------------------------------------------------|-----------------------------------------------------------------------|
| Forward primer in intron 4 and reverse primer in intron 5 for amplification of a junction fragment. | For: 5'-attaaagccatgccgataac-3'<br>Rev: 5'-tgaatttaacagttggaggatc-3'  |
| Primer for blood cDNA analyses                                                                      | For: 5'-aatgactgtggagacaattcag-3'<br>Rev: 5'-agaaatccggttccaagtcac-3' |

**Table S2: OA scoring system.** Modified score for histochemical/histological assessment of articular cartilage changes in OA according to Lavery et al. 2010, Osteoarthritis and Cartilage 18 (Suppl 3), pp53–65 and Riegger et al. 2019, International Journal of Molecular Sciences 20(12), 2916.

| <b><i>Safranin-O- Fast green staining of weight bearing region</i></b> |                                                                                         |
|------------------------------------------------------------------------|-----------------------------------------------------------------------------------------|
| 0                                                                      | Uniform staining throughout articular cartilage                                         |
| 1                                                                      | Loss of staining in 1/3 superficial zone of hyaline cartilage                           |
| 2                                                                      | Loss of staining in 1/3 superficial and lower zone of hyaline cartilage                 |
| 3                                                                      | Additionally, slight reduction in central zone of hyaline cartilage                     |
| 4                                                                      | Overall, poor proteoglycan staining                                                     |
| 5                                                                      | Only some cells/ cluster stained positive                                               |
| 6                                                                      | No staining                                                                             |
| <b><i>Structure</i></b>                                                |                                                                                         |
| 0                                                                      | Normal                                                                                  |
| 1                                                                      | Surface irregularities                                                                  |
| 2                                                                      | Fissures in <50% surface                                                                |
| 3                                                                      | Fissures in ≥50% surface                                                                |
| 4                                                                      | Erosion 1/3 hyaline cartilage <50% surface                                              |
| 5                                                                      | Erosion 1/3 hyaline cartilage ≥50% surface                                              |
| 6                                                                      | Erosion 2/3 hyaline cartilage <50% surface                                              |
| 7                                                                      | Erosion 2/3 hyaline cartilage ≥50% surface                                              |
| 8                                                                      | Full depth erosion hyaline cartilage <50% surface                                       |
| 9                                                                      | Full depth erosion hyaline cartilage ≥50% surface                                       |
| 10                                                                     | Full depth erosion hyaline and calcified cartilage to the subchondral bone <50% surface |
| 11                                                                     | Full depth erosion hyaline and calcified cartilage to the subchondral bone ≥50% surface |

| <b><i>Hypocellularity</i></b>   |                              |
|---------------------------------|------------------------------|
| 0                               | Normal                       |
| 1                               | Focal decrease in cells      |
| 2                               | Multifocal decrease in cells |
| 3                               | Confluent decrease in cells  |
| 4                               | Largely de-cellularized      |
| <b><i>Cluster formation</i></b> |                              |
| 0                               | Normal                       |
| 1                               | < 4 Clusters                 |
| 2                               | ≥ 4 Clusters                 |
| 3                               | ≥ 8 Clusters                 |

**Table S3: Synovitis scoring system.** Modified Score for histopathological assessment of OA synoviopathy according to Lavery et al. 2010, Osteoarthritis and Cartilage 18, Suppl 3, pp53–65.

| <b><i>Synoviocytes</i></b>                    |             |                                          |
|-----------------------------------------------|-------------|------------------------------------------|
| Proliferation                                 | 0: Normal   | One layer                                |
|                                               | 1: Slight   | Up to two cells deep                     |
|                                               | 2: Moderate | Up to four cells deep                    |
|                                               | 3: Severe   | Up to more than four cells deep          |
| Hypertrophy                                   | 0: Normal   | Squamous                                 |
|                                               | 1: Slight   | Cuboidal                                 |
|                                               | 2: Moderate | Cylindrical                              |
|                                               | 3: Severe   | Cylindrical with cytoplasmic protrusions |
| <b><i>Inflammatory infiltrate</i></b>         |             |                                          |
| Granulocytic and lymphoplasmacytic infiltrate | 0: Absent   |                                          |
|                                               | 1: Slight   | Few cells                                |
|                                               | 2: Moderate | Some foci of cells                       |
|                                               | 3: Severe   | Diffuse infiltration                     |
| Lymphoplasmacytic aggregates/follicles        | 0: Absent   |                                          |
|                                               | 1: Single   | 1                                        |
|                                               | 2: Many     | >1                                       |
| <b><i>Synovial stroma</i></b>                 |             |                                          |
| Villous hyperplasia                           | 0: Absent   | No villi/smooth waves                    |
|                                               | 1: Slight   | Some small villi                         |
|                                               | 2: Moderate | Multifocal villous hyperplasia           |
|                                               | 3: Severe   | Diffuse villous hyperplasia              |

|                                         |             |                         |
|-----------------------------------------|-------------|-------------------------|
| Proliferation of fibroblasts/fibrocytes | 0: Absent   | Normal cellular density |
|                                         | 1: Slight   | Mild proliferation      |
|                                         | 2: Moderate | Moderate proliferation  |
|                                         | 3: Severe   | Extensive proliferation |
| Proliferation of blood vessels          | 0: Normal   |                         |
|                                         | 1: Slight   | Mild proliferation      |
|                                         | 2: Moderate | Moderate proliferation  |
|                                         | 3: Severe   | Extensive proliferation |

## Supplementary Figures

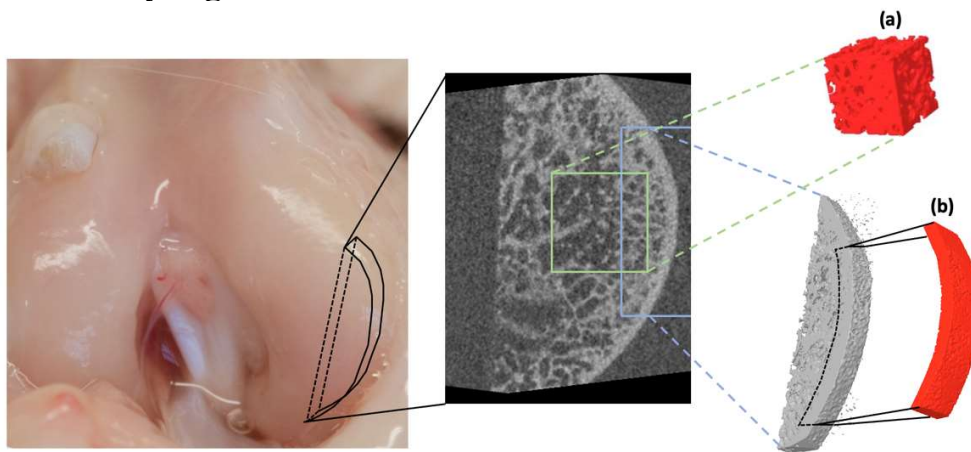

**Figure S1: Assessment of the condylar bone by  $\mu$ CT.** To assess BV/TV, Tb.Th, Tb.Sp, and Tb.N, an area of  $2 \text{ mm}^3$  of the trabecular bone was defined in the medial condyle (see (a)). For the assessment of cBM and cTh, a defined area with a width of 1.9 mm, a height of 11 mm, and a depth of 1 mm was chosen (see (b)).

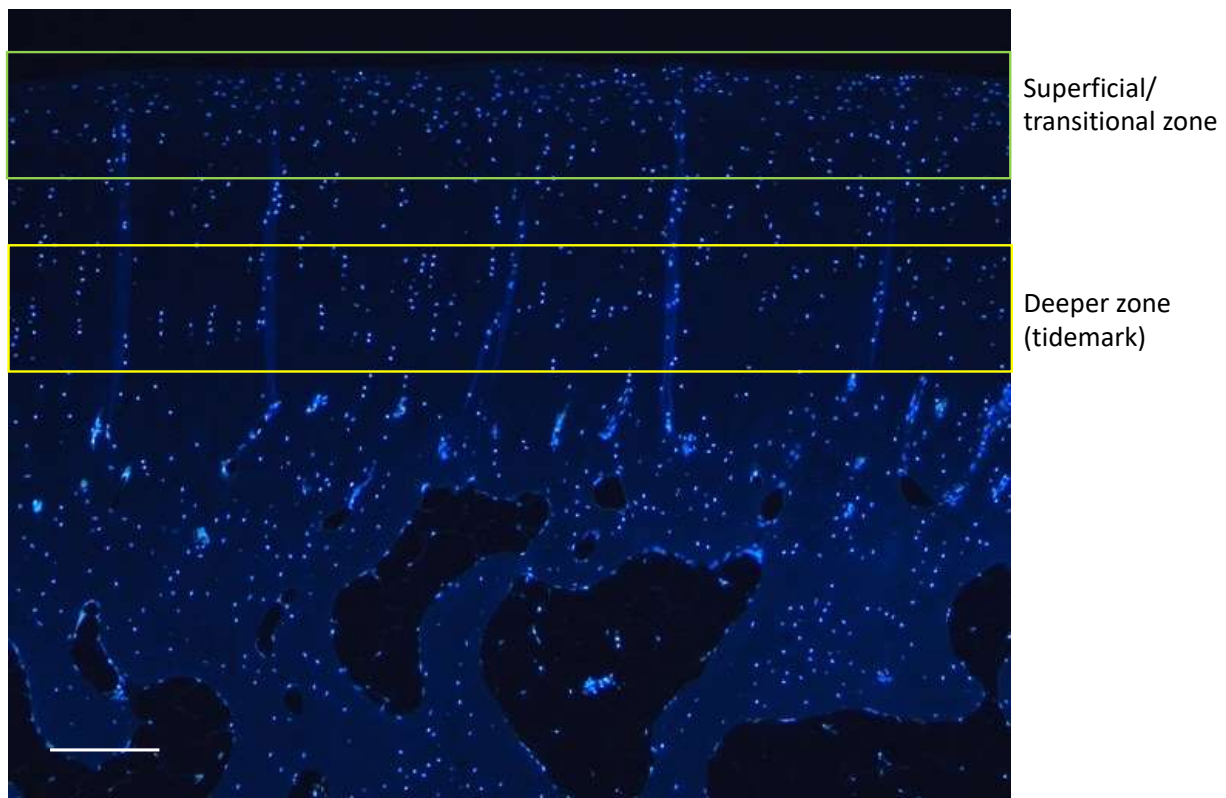

**Figure S2: Zones considered in the TUNEL assay.** Images were taken from the superficial/ transitional zone (green box) as well as from the deeper zone/ tidemark region (yellow box). The white bar represents 200  $\mu$ m.

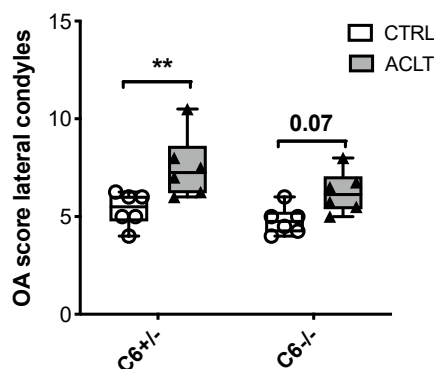

**Figure S3: Histopathologic assessment of lateral femoral condyle sections.** Statistical analysis of the overall score, comprising proteoglycan content/ Safo staining intensities, structure/ surface integrity, hypocellularity, and cluster formation. Data are charted as box plots with median and whiskers min to max; white boxes= control joint, grey boxes= ACLT-operated joints; n=6.

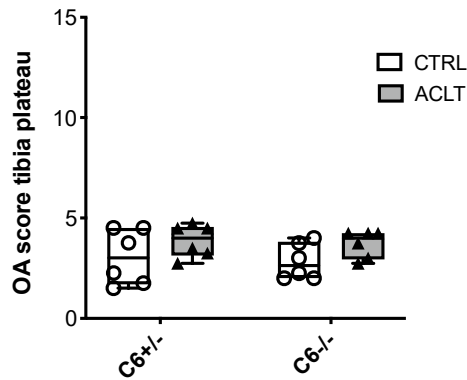

**Figure S4: Histopathologic assessment of tibia plateau (medial + lateral) sections.** Statistical analysis of the overall score, comprising proteoglycan content/ SafO staining intensities, structure/ surface integrity, hypocellularity, and cluster formation. Data are charted as box plots with median and whiskers min to max; white boxes= control joint, grey boxes= ACLT-operated joints; n=6.

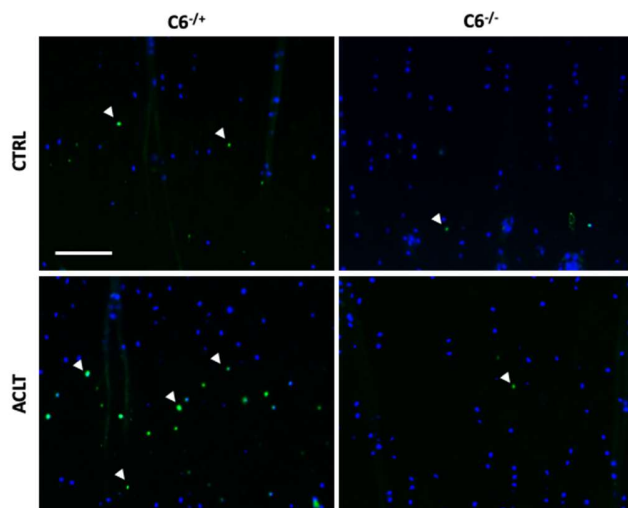

**Figure S5: TUNEL staining.** Exemplary images of TUNEL staining taken from the deep zone (tidemark). White arrowhead= TUNEL-positive cell (green); the white bar represents 100  $\mu$ m; n= 3.
